# Supplementary material for: Cezanne (OTUD7B) regulates HIF-1α homeostasis in a proteasome-independent manner
Source: PubMed Central journal article supplement (PMC4264929; doi:10.15252/embr.201438850), 2014-10-29

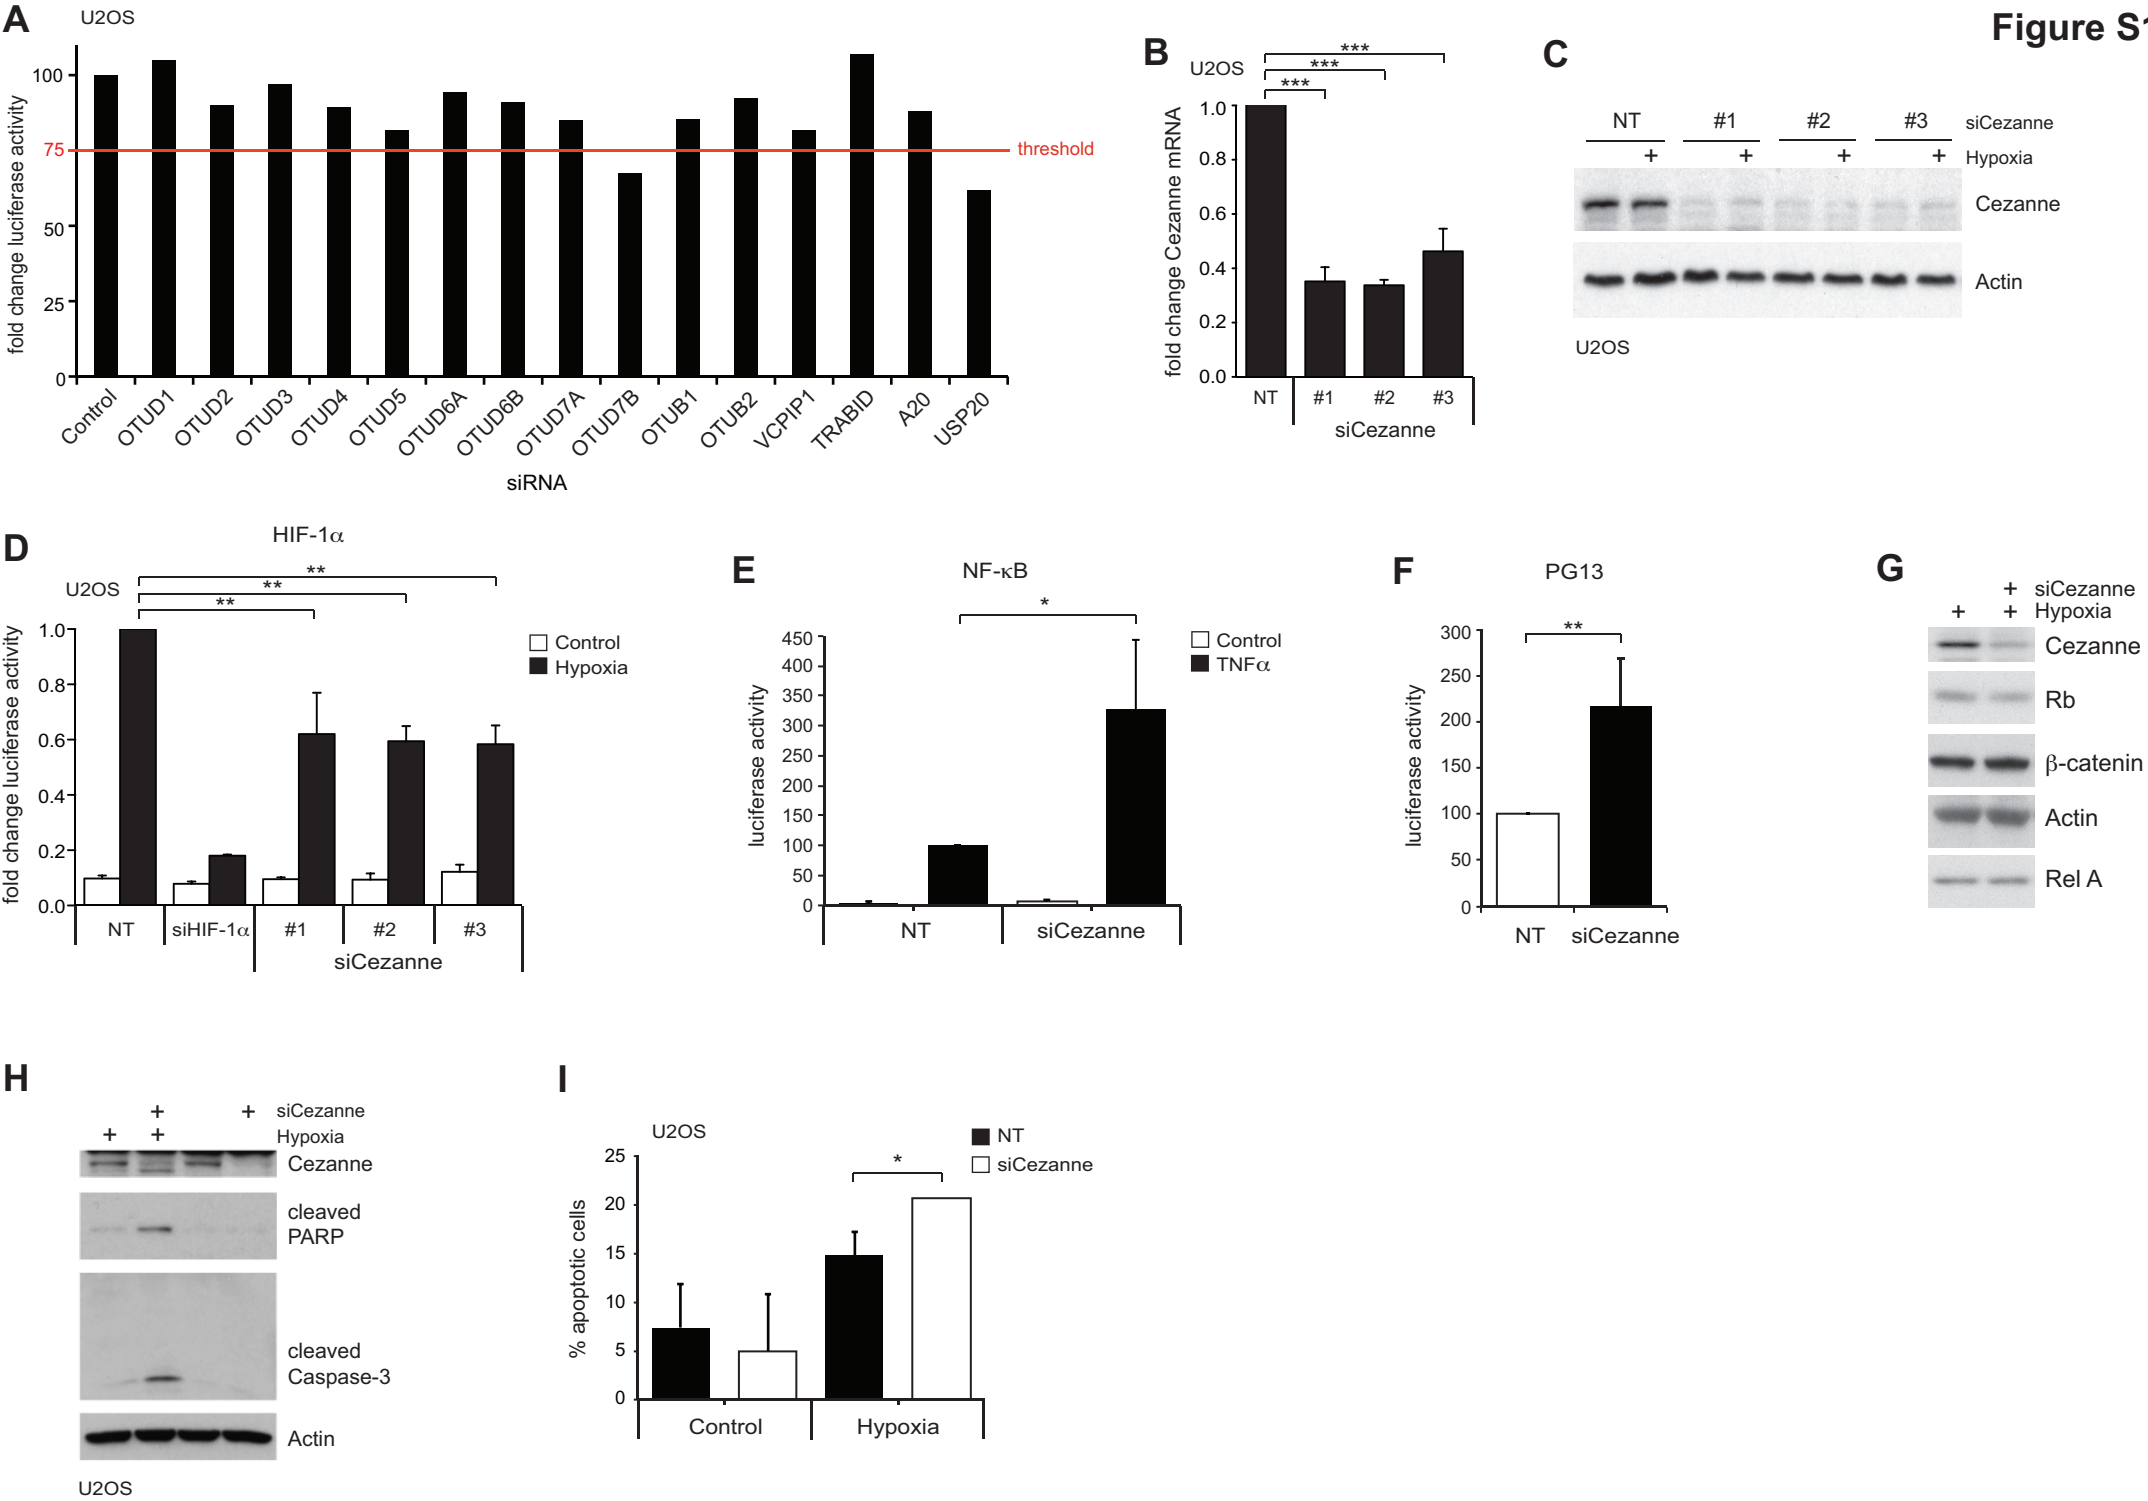

Supplement: embr0015-1268-sd1.pdf [file embr0015-1268-sd1.pdf]
